# Supplementary material
Source: PubMed Central journal article supplement (PMC4902609)
Supplement: supp_pp.16.00262_PP2016-00262R1_Supplemental_Tables_1_to_3.pdf [file supp_pp.16.00262_PP2016-00262R1_Supplemental_Tables_1_to_3.pdf]

**Table S1:** Genes whose allelic expression levels in the hybrids significantly differ from the expected allelic expression ratio of the parents.

| Tissue            | Hybrid                | Genes with unexpected allelic expression ratio |                       |          |                               |          |     |
|-------------------|-----------------------|------------------------------------------------|-----------------------|----------|-------------------------------|----------|-----|
|                   |                       | Total                                          |                       |          | Nonadditively expressed genes |          |     |
|                   |                       | (FDR <5%)                                      | Overlap               |          | (FDR <5%)                     | Overlap  |     |
|                   | Expected <sup>c</sup> | Observed                                       | Expected <sup>c</sup> | Observed | Expected <sup>c</sup>         | Observed |     |
| Meristematic zone | B73xMo17 <sup>a</sup> | 150                                            | 1                     | 47*      | 58                            | 0        | 27* |
|                   | Mo17xB73 <sup>b</sup> | 99                                             |                       |          | 40                            |          |     |
| Elongation zone   | B73xMo17 <sup>a</sup> | 106                                            | 1                     | 41*      | 29                            | 0        | 12* |
|                   | Mo17xB73 <sup>b</sup> | 112                                            |                       |          | 26                            |          |     |
| Stele             | B73xMo17 <sup>a</sup> | 228                                            | 3                     | 92*      | 33                            | 0        | 19* |
|                   | Mo17xB73 <sup>b</sup> | 185                                            |                       |          | 36                            |          |     |
| Cortex            | B73xMo17 <sup>a</sup> | 126                                            | 1                     | 47*      | 28                            | 0        | 14* |
|                   | Mo17xB73 <sup>b</sup> | 87                                             |                       |          | 27                            |          |     |
| In all tissues    | B73xMo17 <sup>a</sup> | 498                                            | 7                     | 160*     | 57                            | 0        | 15* |
|                   | Mo17xB73 <sup>b</sup> | 401                                            |                       |          | 56                            |          |     |

Expected allelic expression levels in the hybrids are calculated from the allelic expression ratio of their parents:

$$^a \frac{b_{B73}/m_{Mo17}}{b_{B73xMo17}/m_{B73xMo17}}$$

$$^b \frac{b_{B73}/m_{Mo17}}{b_{Mo17xB73}/m_{Mo17xB73}}$$

The number of genes is shown for which the depicted criteria are fulfilled under controlling the false discovery rate (FDR) at 5%.

<sup>c</sup> Expected values were calculated as [(# of genes with unexpected allelic ratio in B73xMo17) x (# of genes with unexpected allelic ratio in Mo17xB73)] / (total # of genes with B73-Mo17 SNP position). The numbers of expected and observed overlapping genes were compared using a  $\chi^2$ -test. Significant differences between expected and observed values are indicated by \*:  $p \leq 0.01$ .

**Table S2:** Classification of the gene expression level in the two reciprocal hybrids B73xMo17 and Mo17xB73 relative to the level of their parental inbred lines according to nine gene expression classes.

| Class | Expression pattern <sup>a</sup> | Tissue | Nonadditively expressed genes <sup>b</sup> (Total # of differentially expressed genes) |          |                       |          |                       |          |      |           |
|-------|---------------------------------|--------|----------------------------------------------------------------------------------------|----------|-----------------------|----------|-----------------------|----------|------|-----------|
|       |                                 |        | B73xMo17                                                                               |          | Mo17xB73              |          | Overlap               |          |      |           |
|       |                                 |        | Expected <sup>c</sup>                                                                  | Observed | Expected <sup>c</sup> | Observed | Expected <sup>c</sup> | Observed |      |           |
| 1     | LP<H<HP                         | MZ     | 432                                                                                    | (1,427)  | 412                   | (1,249)  | 9                     | (85)     | 343* | (1,017*)  |
|       |                                 | EZ     | 300                                                                                    | (989)    | 336                   | (1,141)  | 5                     | (57)     | 244* | (798*)    |
|       |                                 | S      | 294                                                                                    | (1,314)  | 293                   | (1,239)  | 4                     | (74)     | 239* | (1,025*)  |
|       |                                 | C      | 205                                                                                    | (930)    | 214                   | (850)    | 2                     | (37)     | 159* | (649*)    |
| 2     | LP=H<HP                         | MZ     | 81                                                                                     | (2,409)  | 11                    | (1,238)  | 0                     | (143)    | 4*   | (784*)    |
|       |                                 | EZ     | 1                                                                                      | (828)    | 8                     | (1,004)  | 0                     | (42)     | 0    | (416*)    |
|       |                                 | S      | 16                                                                                     | (1,320)  | 12                    | (1,041)  | 0                     | (62)     | 3*   | (634*)    |
|       |                                 | C      | 4                                                                                      | (799)    | 14                    | (690)    | 0                     | (26)     | 1*   | (314*)    |
| 3     | LP<H=HP                         | MZ     | 201                                                                                    | (1,316)  | 262                   | (1,765)  | 3                     | (111)    | 105* | (751*)    |
|       |                                 | EZ     | 339                                                                                    | (1,912)  | 277                   | (1,617)  | 5                     | (155)    | 190* | (1,128*)  |
|       |                                 | S      | 217                                                                                    | (1,745)  | 271                   | (1,896)  | 3                     | (150)    | 148* | (1,271*)  |
|       |                                 | C      | 232                                                                                    | (1,734)  | 336                   | (2,041)  | 4                     | (166)    | 158* | (1,212*)  |
| 4     | LP=HP=H                         | MZ     | 0                                                                                      | (11,161) | 0                     | (11,936) | 0                     | (6,374)  | 0    | (10,901*) |
|       |                                 | EZ     | 0                                                                                      | (11,650) | 0                     | (11,640) | 0                     | (6,799)  | 0    | (11,557*) |
|       |                                 | S      | 0                                                                                      | (13,288) | 0                     | (13,320) | 0                     | (8,045)  | 0    | (13,193*) |
|       |                                 | C      | 0                                                                                      | (13,779) | 0                     | (13,747) | 0                     | (8,903)  | 0    | (13,666*) |
| 5     | LP<HP<H                         | MZ     | 1                                                                                      | (1)      | 1                     | (1)      | 0                     | (0)      | 0    | (0)       |
|       |                                 | EZ     | 0                                                                                      | (0)      | 0                     | (0)      | 0                     | (0)      | 0    | (0)       |
|       |                                 | S      | 2                                                                                      | (2)      | 2                     | (2)      | 0                     | (0)      | 1*   | (1*)      |
|       |                                 | C      | 1                                                                                      | (1)      | 0                     | (0)      | 0                     | (0)      | 0    | (0)       |
| 6     | LP=HP<H                         | MZ     | 26                                                                                     | (26)     | 3                     | (3)      | 0                     | (0)      | 1*   | (1*)      |
|       |                                 | EZ     | 3                                                                                      | (3)      | 2                     | (2)      | 0                     | (0)      | 1*   | (1*)      |
|       |                                 | S      | 1                                                                                      | (1)      | 5                     | (5)      | 0                     | (0)      | 0    | (0)       |
|       |                                 | C      | 2                                                                                      | (2)      | 4                     | (4)      | 0                     | (0)      | 0    | (0)       |
| 7     | H<LP<HP                         | MZ     | 3                                                                                      | (3)      | 2                     | (2)      | 0                     | (0)      | 1*   | (1*)      |
|       |                                 | EZ     | 0                                                                                      | (0)      | 0                     | (0)      | 0                     | (0)      | 0    | (0)       |
|       |                                 | S      | 0                                                                                      | (0)      | 0                     | (0)      | 0                     | (0)      | 0    | (0)       |
|       |                                 | C      | 1                                                                                      | (1)      | 0                     | (0)      | 0                     | (0)      | 0    | (0)       |
| 8     | H<LP=HP                         | MZ     | 109                                                                                    | (120)    | 3                     | (16)     | 0                     | (0)      | 3*   | (3*)      |
|       |                                 | EZ     | 1                                                                                      | (2)      | 1                     | (7)      | 0                     | (0)      | 1*   | (1*)      |
|       |                                 | S      | 12                                                                                     | (16)     | 4                     | (9)      | 0                     | (0)      | 4*   | (4*)      |
|       |                                 | C      | 4                                                                                      | (5)      | 2                     | (2)      | 0                     | (0)      | 1*   | (1*)      |
| 9     | ambiguous                       | MZ     | 100                                                                                    | (4,436)  | 12                    | (4,689)  | 0                     | (995)    | 0    | (2,884*)  |
|       |                                 | EZ     | 5                                                                                      | (4,562)  | 8                     | (4,535)  | 0                     | (1,037)  | 1*   | (3,831*)  |
|       |                                 | S      | 6                                                                                      | (4,315)  | 9                     | (4,489)  | 0                     | (880)    | 1*   | (3,635*)  |
|       |                                 | C      | 10                                                                                     | (4,025)  | 17                    | (3,942)  | 0                     | (746)    | 1*   | (3,260*)  |
| Total |                                 |        | 1,056                                                                                  |          | 824                   |          | 35                    |          | 439* |           |

<sup>a</sup> The classification of gene expression levels in the hybrids (H) into nine classes is based on three pairwise *t*-tests: Tests 1 and 2 estimate if the expression level of the considered gene in the hybrid is significantly different from that of the lower parent (LP) and/or higher parent (HP) (LP≠H; HP≠H) by controlling the false discovery rate (FDR) at 5%. Test 3 compares the expression level of the two parents (LP≠HP).

<sup>b</sup> In each expression class, the number of nonadditively expressed genes have been estimated by comparing the gene expression levels in the hybrids with the mid-parent values.

<sup>c</sup> The number of genes expected to overlap between the two reciprocal hybrids in each class were calculated as [(# of nonadditive genes in B73xMo17) x (# of nonadditive genes in Mo17xB73)]/(# of all expressed genes in the tissue under investigation). The numbers of expected and observed overlapping genes were compared using a  $\chi^2$ -test. Significant differences are indicated by \*:  $p \leq 0.01$ .

**Table S3:** Functional categorization of nonsyntenic nonadditively expressed genes. The 'X' indicates overrepresented categories in the considered gene set in comparison to the GO terms in all expressed genes in the corresponding tissue. For genes of the meristematic zone and stele no GO terms were significantly enriched.

|                           | GO term    | Description                            | Nonsyntenic nonadditively expressed genes |          |                 |          |
|---------------------------|------------|----------------------------------------|-------------------------------------------|----------|-----------------|----------|
|                           |            |                                        | Cortex                                    |          | Elongation zone |          |
|                           |            |                                        | B73xMo17                                  | Mo17xB73 | B73xMo17        | Mo17xB73 |
| <b>Molecular process</b>  | GO:0004497 | Monoxygenase activity                  |                                           | X        |                 |          |
|                           | GO:0070001 | Aspartic-type peptidase activity       |                                           |          |                 | X        |
|                           | GO:0004190 | └ Aspartic-type endopeptidase activity |                                           |          |                 | X        |
|                           | GO:0005506 | Iron ion binding                       | X                                         |          |                 |          |
|                           | GO:0046906 | Tetrapyrrole binding                   | X                                         |          |                 |          |
|                           | GO:0020037 | └ Heme binding                         | X                                         |          |                 |          |
| <b>Biological process</b> | GO:0016265 | Death                                  | X                                         | X        |                 |          |
|                           | GO:0008219 | Cell death                             | X                                         | X        |                 |          |
|                           | GO:0012501 | └ Programmed cell death                | X                                         | X        |                 |          |
|                           | GO:0006915 | └ Apoptosis                            | X                                         | X        |                 |          |
